# Supplementary material for: Pullulan/Poly(vinyl alcohol) Hydrogels Loaded with Calendula officinalis Extract: Design and In Vitro Evaluation for Wound Healing Applications
Source: MDPI journal article supplement (doi:10.3390/pharmaceutics15061674), 2023-06-07
Supplement: s1 [file s1]

## Electronic Supplementary Information (ESI)

Pullulan/poly(vinyl alcohol) hydrogels loaded with *Calendula officinalis* extract: design and in vitro evaluation for wound healing applications

Irina Mihaela Pelin <sup>1</sup>, Mihaela Silion <sup>1</sup>, Irina Popescu <sup>1</sup>, Cristina M. Rîmbu <sup>2</sup>, Gheorghe Fundueanu <sup>1</sup> and Marieta Constantin <sup>1,\*</sup>

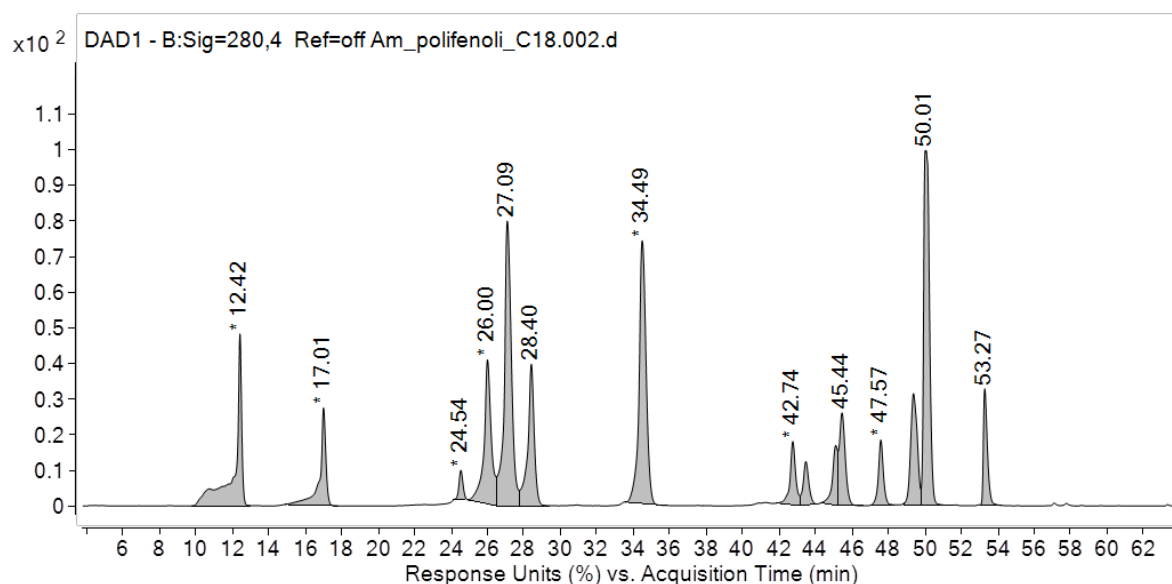

**Figure S1.** HPLC-DAD chromatogram (wavelengths of 280 nm) for standard mixture containing 16 phenolic compounds (gallic acid, 3,4 DHB, chlorogenic acid, vanillic acid, caffeic acid, syringic acid, p-coumaric acid, cinnamic acid, cynarin, quercetin 7-rhamnoside, luteolin 7-o-glucoside, isoquercetin, apigenin 7-glucoside, kaempferol 7-O-glucoside, fisetin, quercetin).

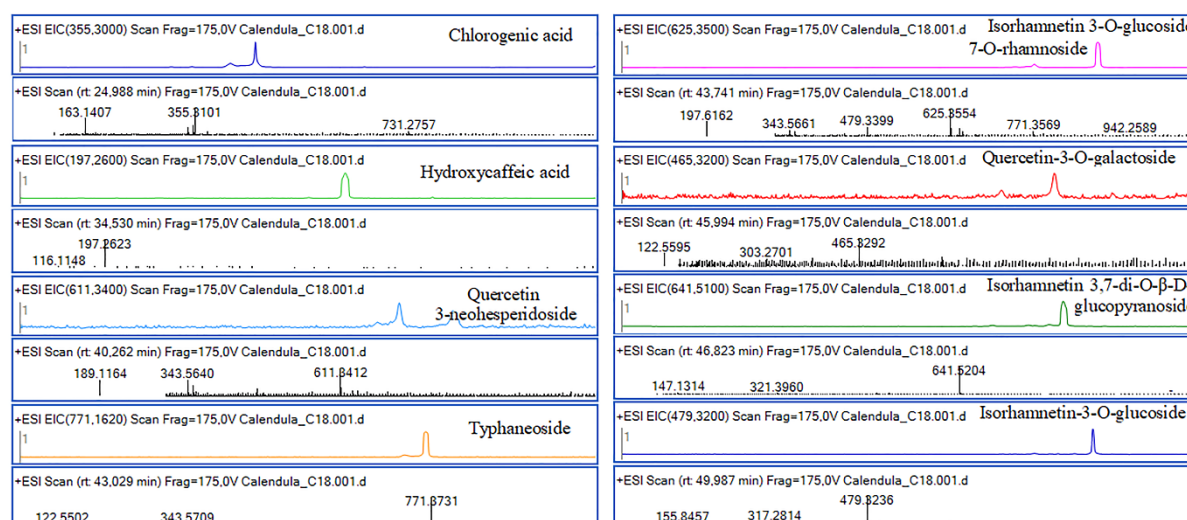

**Figure S2.** ESI(+)-MS extracted ion chromatograms (EIC) and relevant mass spectra for some detected phenolic compounds in *Calendula officinalis* extract.

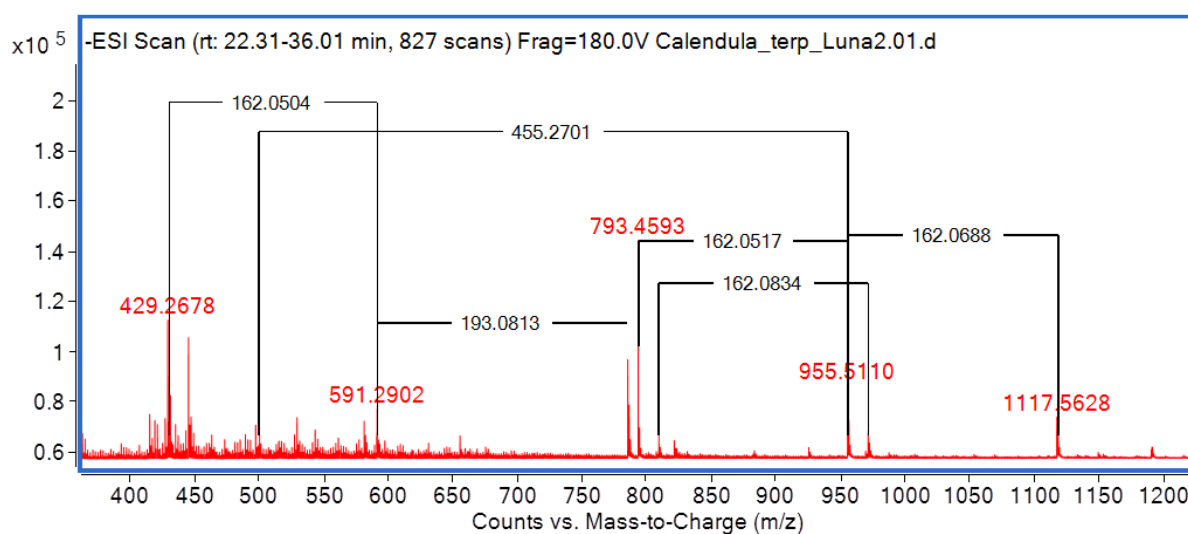

**Figure S3.** Representative ESI(-) mass spectrum for identified triterpenes: oleanolic acid glucuronide D (m/z 793), oleanolic acid glucuronide C (m/z 955), and oleanolic acid glucuronide A (m/z 1117).  
Loss of: hexose (162 Da), hexuronic acid (193 Da), oleanolic acid (455Da).

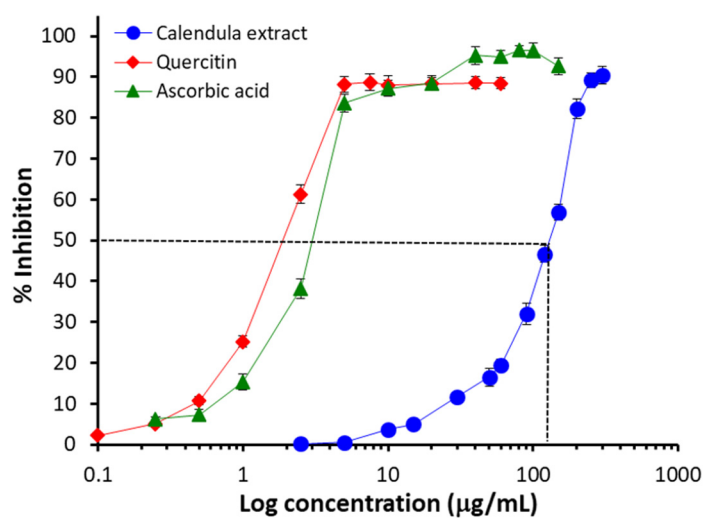

**Figure S4.** DPPH radical scavenging and estimation of  $IC_{50}$  value of *Calendula officinalis* extract, quercetin and ascorbic acid.

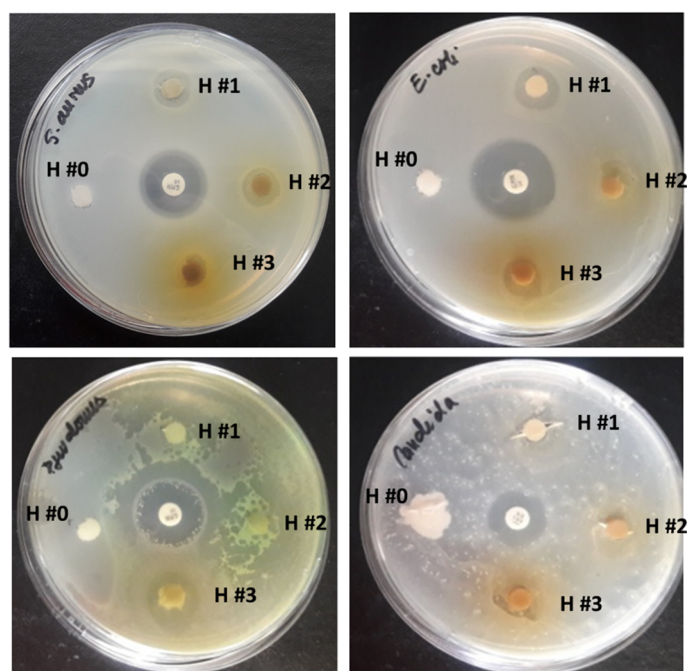

**Figure S5.** Antibacterial activity of unloaded and *Calendula officinalis*-loaded P/PVA hydrogels against *S. aureus*, *E. coli*, *P. aeruginosa* and *C. albicans* through well diffusion assay.
